# Supplementary material for: Biodiesel synthesis from the esterification of free fatty acids and alcohol catalyzed by long-chain Brønsted acid ionic liquid
Source: Royal Society of Chemistry journal article supplement (doi:10.1039/c2cy20714a), 2012-12-19
Supplement: c2cy20714a.pdf [file c2cy20714a.pdf]

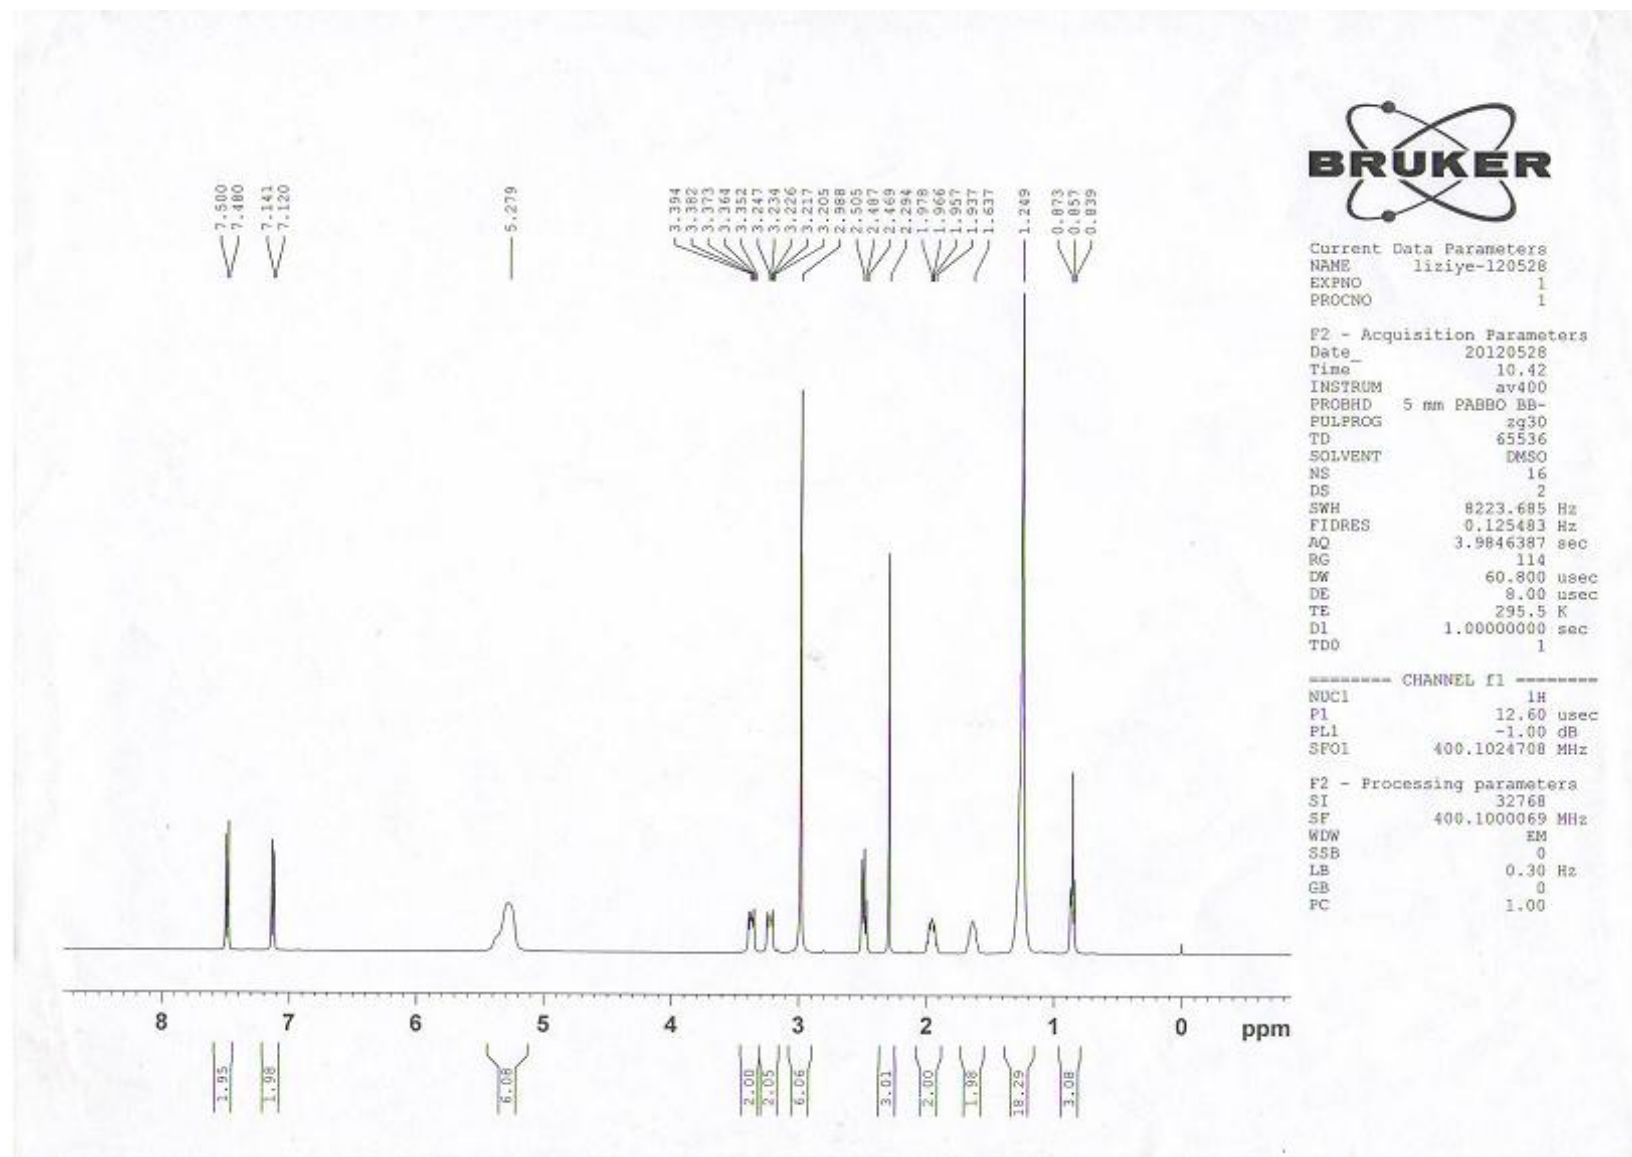

Figure S1.  $^1\text{H}$  NMR Spectrum of [DDPA][Tos]

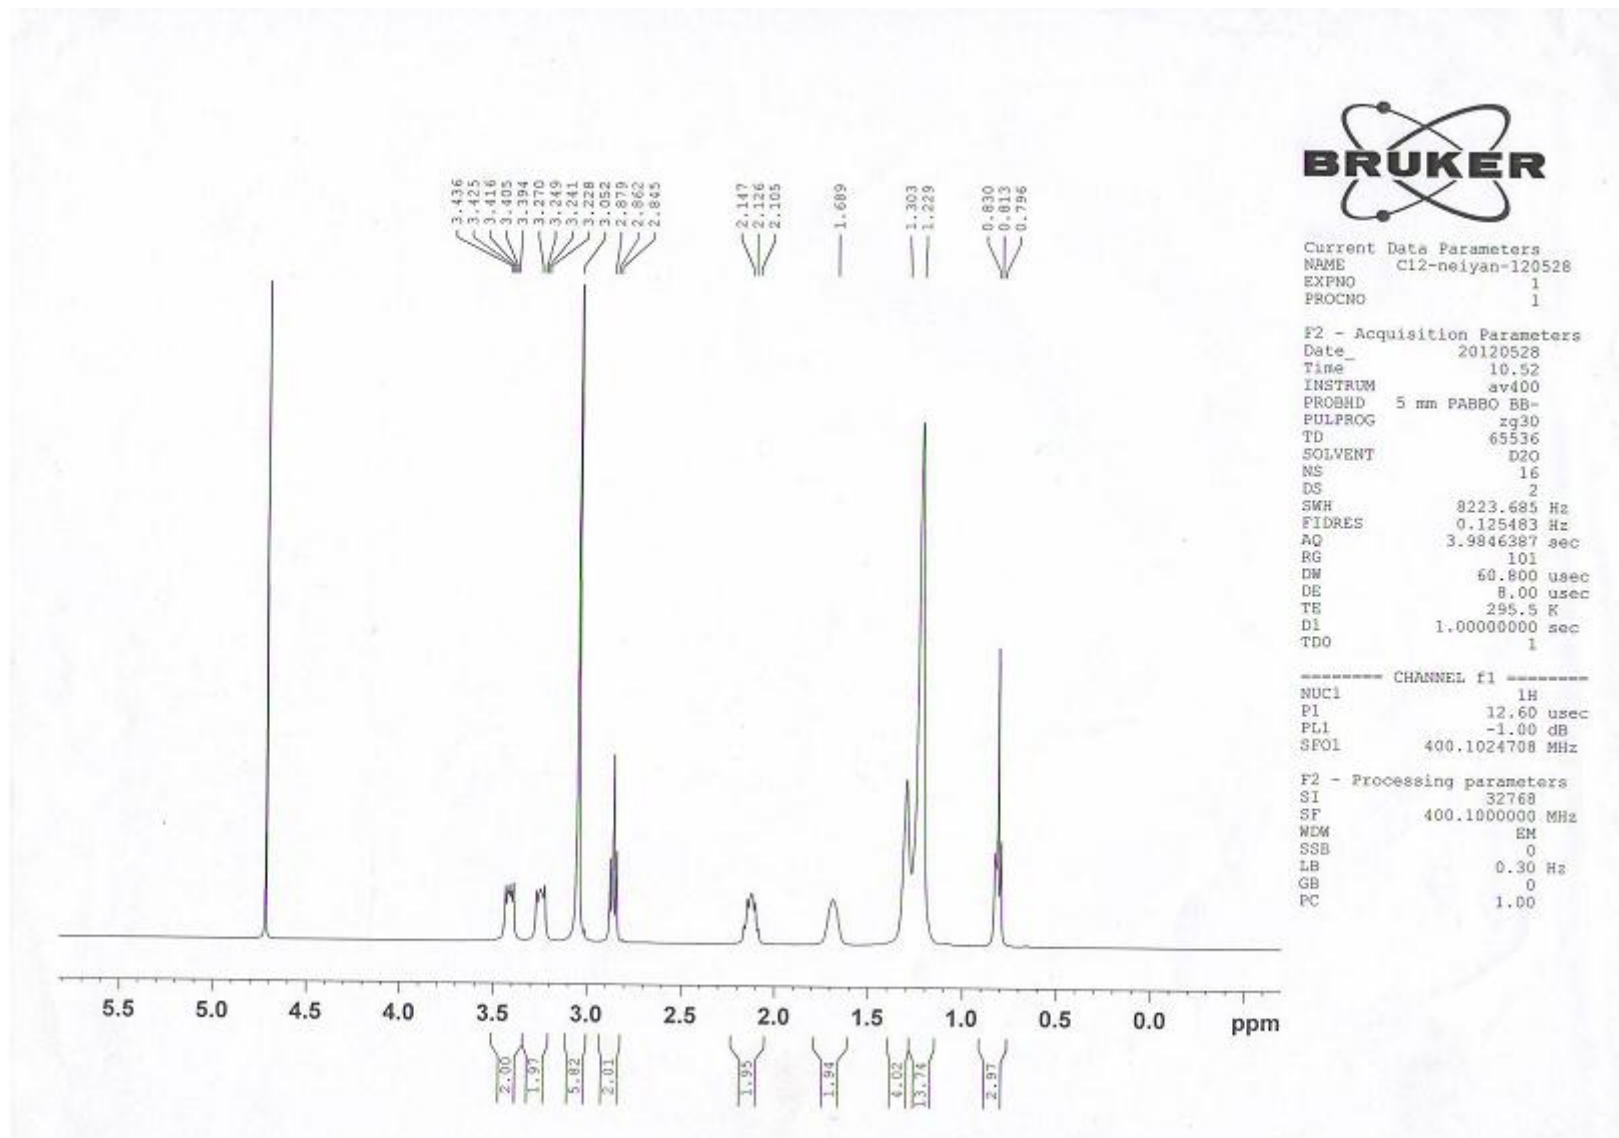

Figure S2. <sup>1</sup>H NMR Spectrum of DDPA

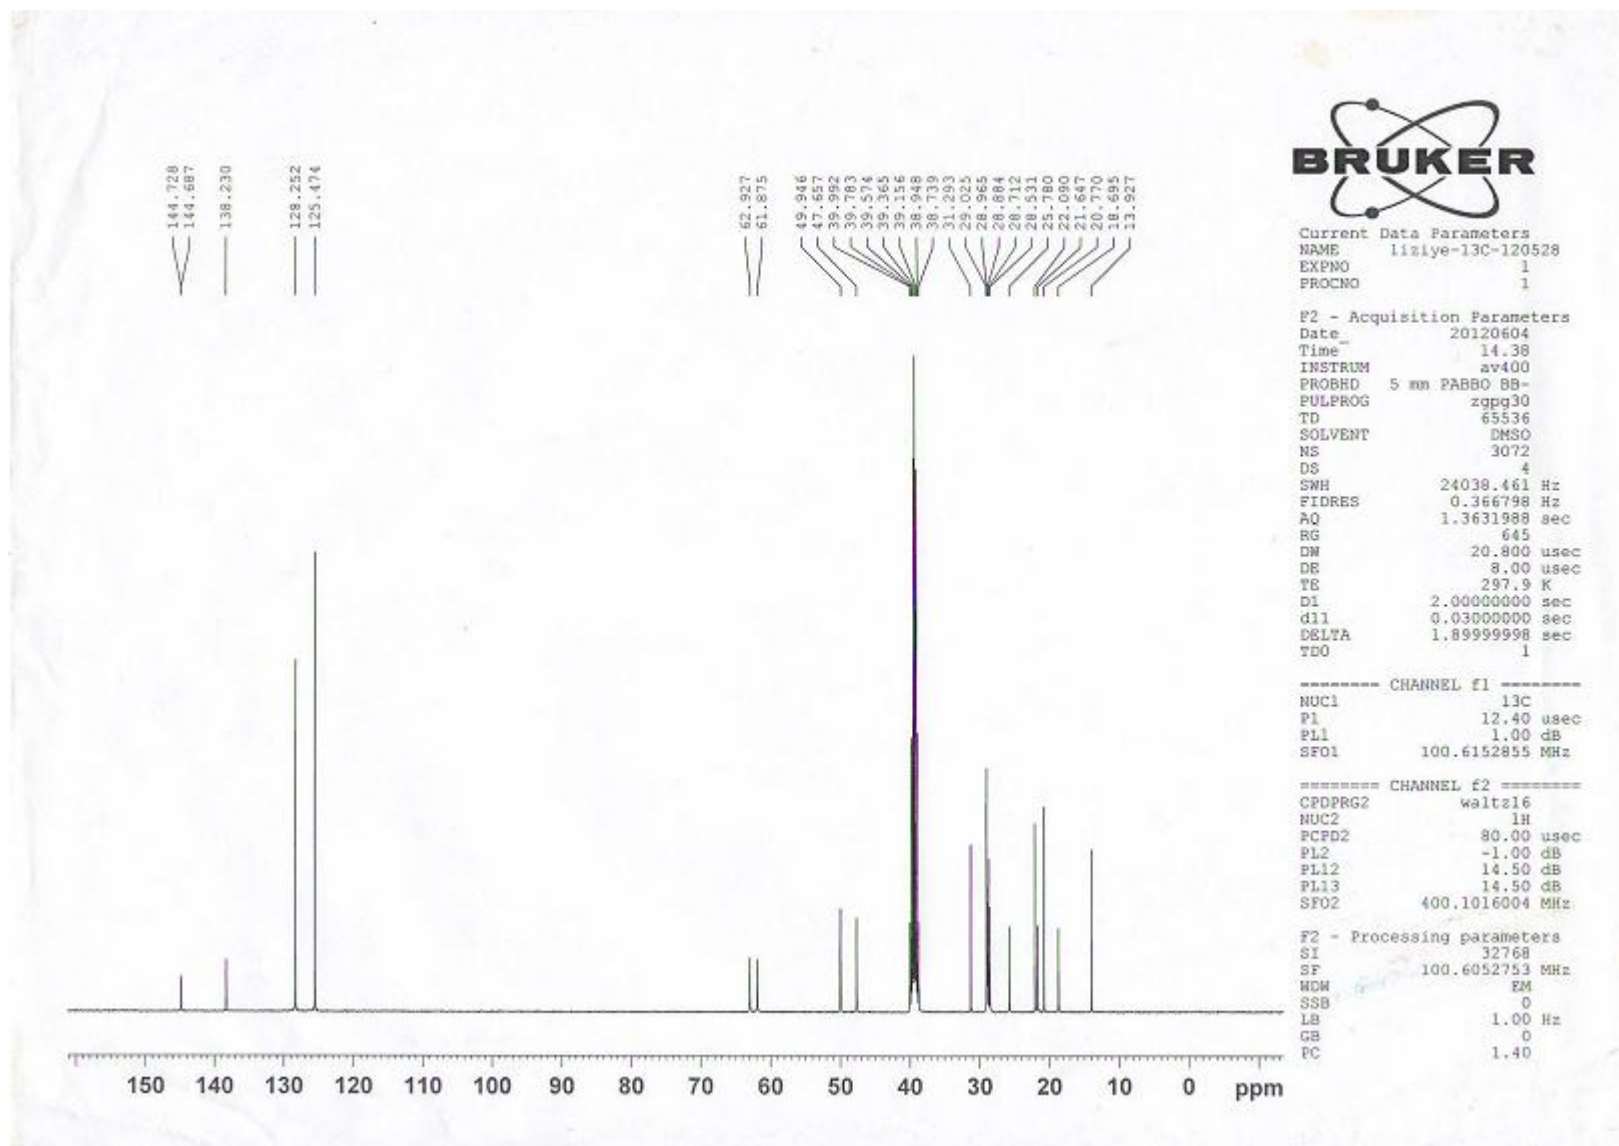

Figure S3.  $^{13}\text{C}$  NMR Spectrum of [DDPA][Tos]

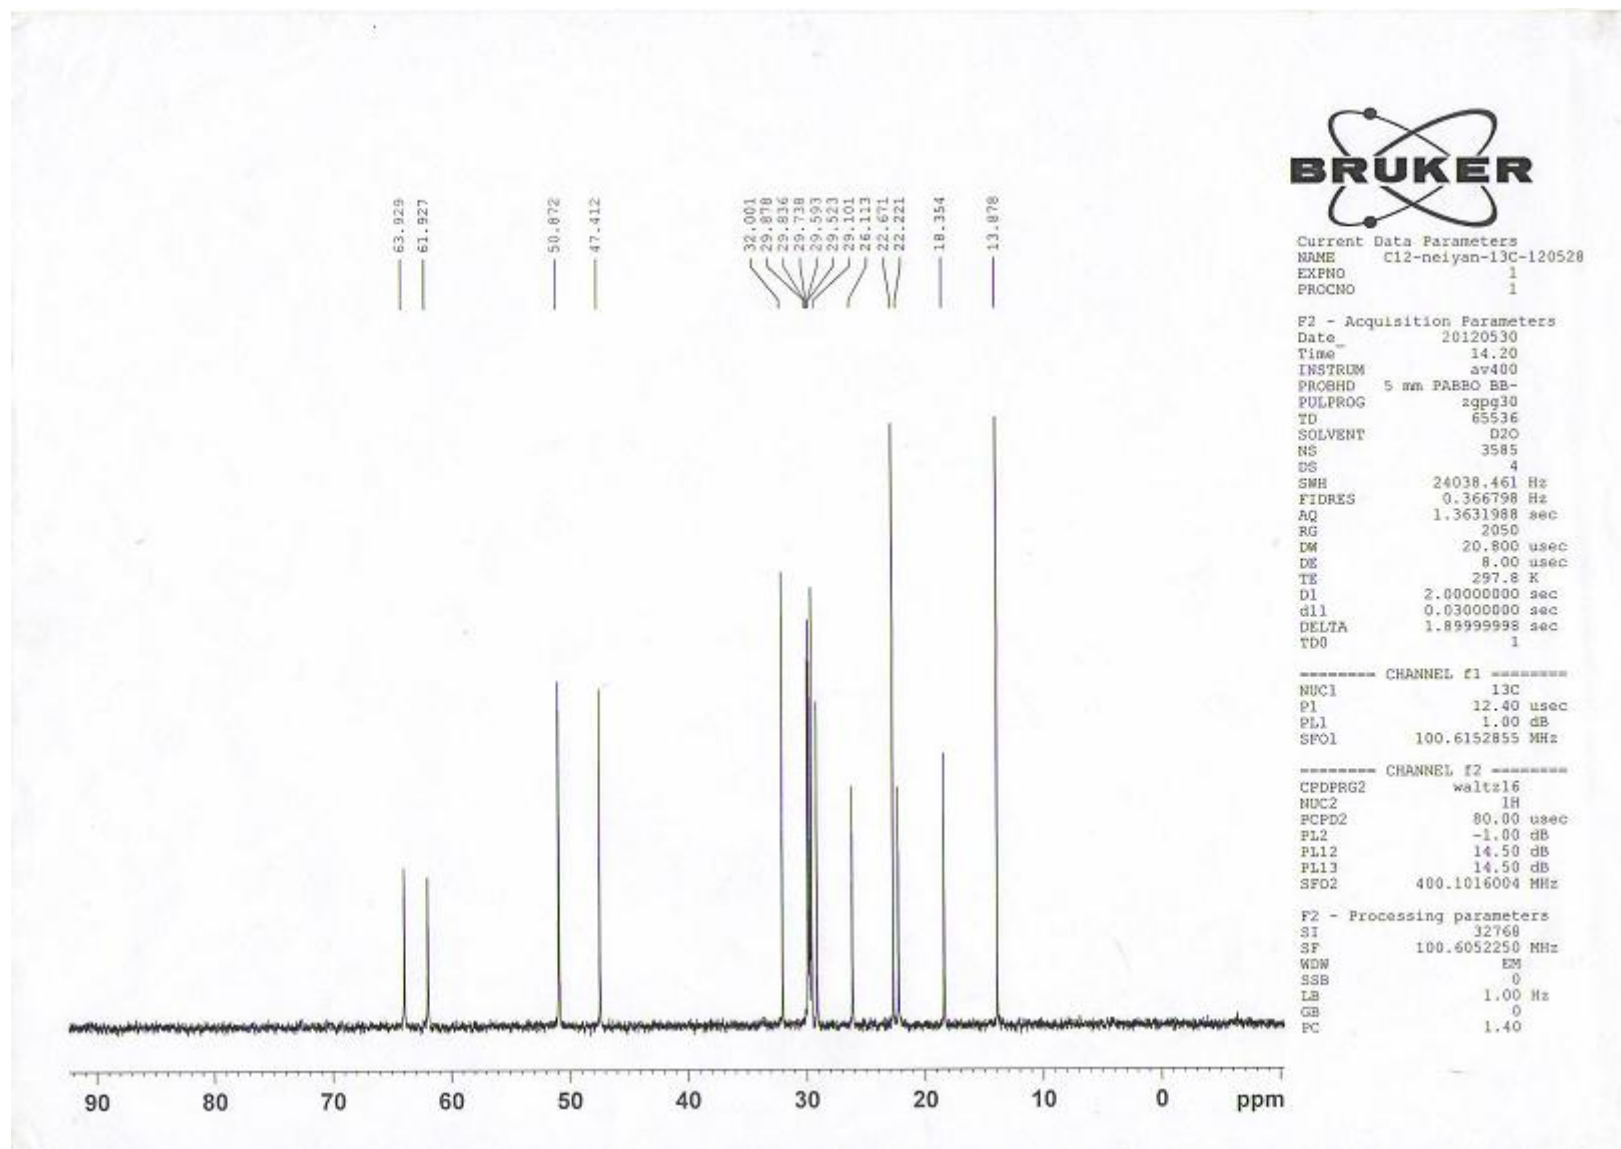

Figure S4.  $^{13}\text{C}$  NMR Spectrum of DDPA

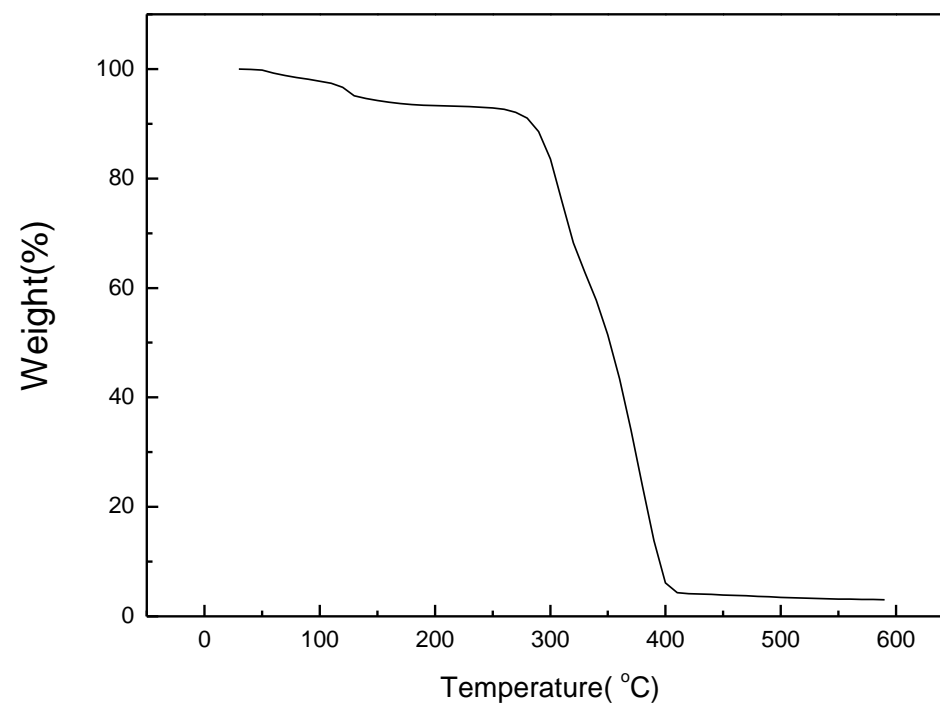

Figure S5. TG curves for [DDPA][Tos]
